# Supplementary material
Source: PubMed Central journal article supplement (PMC6166859)
Supplement: NIHMS72854-supplement-Supplementary_materials.pdf [file NIHMS72854-supplement-Supplementary_materials.pdf]

## Supplementary materials

### A Details of mean score variance

The sandwich variance (6) is computed from  $\mathbf{B}$  and  $\mathbf{C}$ , where  $\mathbf{B}$  has components

$$\begin{aligned}\mathbf{B}_{SS} &= -d\mathbf{U}_S/d\boldsymbol{\beta}_S = \sum_i h'(\hat{\boldsymbol{\beta}}_S \mathbf{x}_{Si}) \mathbf{x}_{Si} \mathbf{x}_{Si}^T \\ \mathbf{B}_{SP} &= -d\mathbf{U}_S/d\boldsymbol{\beta}_P = -\sum_i (1 - r_i) h'(\hat{\boldsymbol{\beta}}_P \mathbf{x}_{Pi} + \Delta_i) \mathbf{x}_{Si} \mathbf{x}_{Pi}^T \\ \mathbf{B}_{PS} &= -d\mathbf{U}_P/d\boldsymbol{\beta}_S = \mathbf{0} \\ \mathbf{B}_{PP} &= -d\mathbf{U}_P/d\boldsymbol{\beta}_P = \sum_i r_i h'(\hat{\boldsymbol{\beta}}_P \mathbf{x}_{Pi}) \mathbf{x}_{Pi} \mathbf{x}_{Pi}^T\end{aligned}$$

and  $\mathbf{C}$  has components

$$\begin{aligned}\mathbf{C}_{SS} &= \sum_i e_{Si}^2 \mathbf{x}_{Si} \mathbf{x}_{Si}^T \\ \mathbf{C}_{SP} = \mathbf{C}_{PS}^T &= \sum_i e_{Si} e_{Pi} \mathbf{x}_{Si} \mathbf{x}_{Pi}^T \\ \mathbf{C}_{PP} &= \sum_i e_{Pi}^2 \mathbf{x}_{Pi} \mathbf{x}_{Pi}^T\end{aligned}$$

where  $e_{Si} = y_i^*(\hat{\boldsymbol{\beta}}_P) - h(\hat{\boldsymbol{\beta}}_S^T \mathbf{x}_{Si})$  and  $e_{Pi} = r_i \{y_i - h(\hat{\boldsymbol{\beta}}_P^T \mathbf{x}_{Pi})\}$ .

### B Modifications for clustered data

If data are clustered, as in a cluster-randomised trial, we need to modify the variance calculations in Sections 2.1 and 2.2 and the small-sample corrections in Sections 3.1 and 3.2. Let  $m$  be the total number of clusters,  $m_{obs}$  be the number of clusters with at least one observed outcome, and  $m_{mis} =$

$m - m_{obs}$  be the number of clusters with no observed outcome. Let the data be subscripted by cluster membership  $c = 1, \dots, m$  as well as individual  $i$ .

For the full sandwich variance method of Section 2.1, we only need to re-define the matrix  $\mathbf{C} = \sum_c \mathbf{U}_c(\hat{\boldsymbol{\beta}})\mathbf{U}_c(\hat{\boldsymbol{\beta}})^T$  where  $\mathbf{U}_c(\hat{\boldsymbol{\beta}}) = \sum_i \mathbf{U}_{ci}(\hat{\boldsymbol{\beta}})$  (Rogers, 1993).

For the two linear regressions method of Section 2.2, we similarly take  $\text{var}(\hat{\boldsymbol{\beta}}_P)$  and  $\text{var}(\hat{\boldsymbol{\beta}}_S - \hat{\boldsymbol{\beta}}_P)$  as clustered sandwich variances.

For the small-sample methods of Section 3, we assume the standard methods use a small-sample correction factor  $f = \frac{n-1}{n-p^*} \frac{m}{m-1}$ , and use  $m - 1$  degrees of freedom for linear regression (StataCorp, 2011). We replace  $n$  and  $m$  by  $n_{eff}$  and  $m_{eff}$ , calculated by the two methods explained below.

For the full sandwich variance method, we compute  $n_{eff}$  as in Section 3.1, and compute  $m_{eff} = m_{obs} + (I_{mis}/I_{mis^*})m_{mis}$ .

For the two linear regressions method, the variance with small-sample correction is (as before)  $\widehat{\text{var}}(\hat{\boldsymbol{\beta}}_P) + \widehat{\text{var}}(\hat{\boldsymbol{\beta}}_S - \hat{\boldsymbol{\beta}}_P) = V_{small}$ . The corresponding variance without small-sample correction is  $\frac{n_{obs}-p}{n_{obs}-1} \frac{m_{obs}-1}{m_{obs}} \widehat{\text{var}}(\hat{\boldsymbol{\beta}}_P) + \frac{n-p}{n-1} \frac{m-1}{m} \widehat{\text{var}}(\hat{\boldsymbol{\beta}}_S - \hat{\boldsymbol{\beta}}_P) = V_{large}$ . The heuristic  $V_{small} \approx \frac{n_{eff}-1}{n_{eff}-p} \frac{m_{eff}}{m_{eff}-1} V_{large}$  leads to the equation  $|V_{small}| = \left(\frac{n_{eff}}{n_{eff}-p}\right)^p |V_{large}|$ . However, we have two unknowns  $n_{eff}$  and  $m_{eff}$ , so we take a second equation representing the variance with small-sample correction only for the number of clusters:  $\frac{m_{obs}-1}{m_{obs}} \widehat{\text{var}}(\hat{\boldsymbol{\beta}}_P) +$

$\frac{m-1}{m} \widehat{\text{var}}(\hat{\boldsymbol{\beta}}_S - \hat{\boldsymbol{\beta}}_P) = V_{lorgen}$  say, with the heuristic  $V_{small} \approx \frac{m_{eff}}{m_{eff}-1} V_{lorgen}$  and the second equation  $|V_{small}| = \left(\frac{m_{eff}}{m_{eff}-1}\right)^p |V_{lorgen}|$ . We solve the second equation for  $m_{eff}$  and then the first equation for  $n_{eff}$ .
